# Supplementary material for: Aromatic stabilization energies in excited states at the multiconfigurational level: assessment in archetypal organic rings
Source: Royal Society of Chemistry journal article supplement (doi:10.1039/d4ra05147e), 2024-01-01
Supplement: d4ra05147e1.pdf [file d4ra05147e1.pdf]

**Aromatic Stabilization Energies in Excited States at the Multiconfigurational Level:  
Assessment in Archetypal Organic Rings**

Ricardo Pino-Rios<sup>a,b</sup>

<sup>a</sup>Química y Farmacia, Facultad de Ciencias de la Salud, Universidad Arturo Prat. Casilla 121, Iquique 1100000, Chile.

<sup>b</sup>Instituto de Ciencias Exactas y Naturales (ICEN), Universidad Arturo Prat, Iquique 1100000, Chile.

Correspondence: rpinoarios@unap.cl

**SUPPORTING INFORMATION**

**Table S1.** Electronic (in a.u.) and Vertical Excited state (VEE in eV) energies for benzene and fulvene at the CASSCF and NEVPT2 levels using def2-TZVP basis set. The last column indicates the experimental/computational reference values reported in the literature.

| Compound                                            | State | CASSCF    | NEVPT2    | VEE <sub>CASSCF</sub> | VEE <sub>NEVPT2</sub> | Refs. 50,51,<br>54–56 |
|-----------------------------------------------------|-------|-----------|-----------|-----------------------|-----------------------|-----------------------|
| C <sub>6</sub> H <sub>6</sub><br>(D <sub>6h</sub> ) | S0    | -230.8492 | -231.7164 | 0.0                   | 0.0                   | 0.0                   |
|                                                     | S1    | -230.6671 | -231.5177 | 5.0                   | 5.4                   | 5.2                   |
|                                                     | S2    | -230.5541 | -231.4909 | 8.0                   | 6.1                   | 6.2                   |
|                                                     | S3    | -230.5484 | -231.3988 | 8.2                   | 8.6                   | 9.0                   |
|                                                     | T1    | -230.7068 | -231.5515 | 3.9                   | 4.5                   | 3.9                   |
|                                                     | T2    | -230.6677 | -231.5303 | 4.9                   | 5.1                   | 4.8                   |
|                                                     | T3    | -230.6677 | -231.5303 | 4.9                   | 5.1                   | —                     |
|                                                     | T4    | -230.5843 | -231.5198 | 7.2                   | 5.3                   | —                     |
| Fulvene                                             | S0    | -230.8005 | -231.6613 | 0.0                   | 0.0                   | —                     |
|                                                     | S1    | -230.6466 | -231.5260 | 4.2                   | 3.7                   | 3.4                   |
|                                                     | S2    | -230.5751 | -231.4343 | 6.1                   | 6.2                   | 5.3                   |
|                                                     | S3    | -230.5301 | -231.4345 | 7.4                   | 6.2                   | —                     |
|                                                     | T1    | -230.7059 | -231.5650 | 2.6                   | 2.6                   | 2.4                   |
|                                                     | T2    | -230.6809 | -231.5390 | 3.3                   | 3.3                   | 3.1                   |
|                                                     | T3    | -230.5994 | -231.4487 | 5.5                   | 5.8                   | —                     |
|                                                     | T4    | -230.5639 | -231.4202 | 6.4                   | 6.6                   | —                     |

**Table S2.** Electronic (in a.u.) and Vertical Excited state (VEE in eV) energies for cyclobutadiene and triafulvene at the CASSCF and NEVPT2 levels using def2-TZVP basis set. The last column indicates the experimental/computational reference values reported in the literature.

| Compound                                            | State | CASSCF    | NEVPT2    | VEE <sub>CASSCF</sub> | VEE <sub>NEVPT2</sub> | Ref. 33 |
|-----------------------------------------------------|-------|-----------|-----------|-----------------------|-----------------------|---------|
| C <sub>4</sub> H <sub>4</sub><br>(D <sub>4h</sub> ) | S0    | -153.7270 | -154.2980 | 0.0                   | 0.0                   | 0.00    |
|                                                     | S1    | -153.6603 | -154.2599 | 1.8                   | 1.0                   | —       |
|                                                     | S2    | -153.5999 | -154.2395 | 3.5                   | 1.6                   | —       |
|                                                     | S3    | -153.3993 | -154.0594 | 8.9                   | 6.5                   | —       |
|                                                     | T1    | -153.7209 | -154.2987 | 0.2                   | 0.0                   | —       |
|                                                     | T2    | -153.5774 | -154.1348 | 4.1                   | 4.4                   | —       |
|                                                     | T3    | -153.5765 | -154.1321 | 4.1                   | 4.5                   | —       |
|                                                     | T4    | -153.3899 | -154.0688 | 9.2                   | 6.2                   | —       |
| C <sub>4</sub> H <sub>4</sub><br>(D <sub>2h</sub> ) | S0    | -153.7480 | -154.3245 | 0.0                   | 0.0                   | —       |
|                                                     | S1    | -153.5763 | -154.2270 | 4.7                   | 2.7                   | 3.14    |
|                                                     | S2    | -153.5759 | -154.1580 | 4.7                   | 4.5                   | 4.03    |
|                                                     | S3    | -153.3901 | -154.0851 | 9.7                   | 6.5                   | —       |
|                                                     | T1    | -153.6909 | -154.2683 | 1.6                   | 1.5                   | 1.61    |
|                                                     | T2    | -153.5864 | -154.1436 | 4.4                   | 4.9                   | —       |
|                                                     | T3    | -153.5094 | -154.0648 | 6.5                   | 7.1                   | —       |
|                                                     | T4    | -153.3902 | -154.0918 | 9.7                   | 6.3                   | —       |
| Triafulvene                                         | S0    | -153.7562 | -154.3469 | 0.0                   | 0.0                   | —       |
|                                                     | S1    | -153.5795 | -154.1806 | 4.8                   | 4.5                   | —       |
|                                                     | S2    | -153.4414 | -154.0821 | 8.6                   | 7.2                   | —       |
|                                                     | S3    | -153.3586 | -153.9985 | 10.8                  | 9.5                   | —       |
|                                                     | T1    | -153.6297 | -154.2179 | 3.4                   | 3.5                   | —       |
|                                                     | T2    | -153.5857 | -154.1711 | 4.6                   | 4.8                   | —       |
|                                                     | T3    | -153.4851 | -154.1193 | 7.4                   | 6.2                   | —       |
|                                                     | T4    | -153.3240 | -154.0392 | 11.8                  | 8.4                   | —       |

**Table S3.** Electronic (in a.u.) and Vertical Excited state (VEE in eV) energies for cyclooctatetraene and heptafulvene at the CASSCF and NEVPT2 levels using def2-TZVP basis set. The last column indicates the experimental/computational reference values reported in the literature.

| Compound                                            | State | CASSCF    | NEVPT2    | VEE <sub>CASSCF</sub> | VEE <sub>NEVPT2</sub> | Ref. 31 and 53 |
|-----------------------------------------------------|-------|-----------|-----------|-----------------------|-----------------------|----------------|
| C <sub>8</sub> H <sub>8</sub><br>(D <sub>8h</sub> ) | S0    | -307.7065 | -308.8397 | 0.0                   | 0.0                   | 0.0            |
|                                                     | S1    | -307.6588 | -308.8190 | 1.3                   | 0.6                   | 1.4            |
|                                                     | S2    | -307.6002 | -308.8128 | 2.9                   | 0.7                   | —              |
|                                                     | S3    | -307.5233 | -308.6759 | 5.0                   | 4.5                   | —              |
|                                                     | T1    | -307.6842 | -308.8349 | 0.6                   | 0.1                   | 0.7            |
|                                                     | T2    | -307.5785 | -308.7124 | 3.5                   | 3.5                   | —              |
|                                                     | T3    | -307.5784 | -308.7124 | 3.5                   | 3.5                   | —              |
|                                                     | T4    | -307.5561 | -308.7027 | 4.1                   | 3.7                   | —              |
| C <sub>8</sub> H <sub>8</sub><br>(D <sub>4h</sub> ) | S0    | -307.7158 | -308.8527 | 0.0                   | 0.0                   | 0.0            |
|                                                     | S1    | -307.6049 | -308.7982 | 3.0                   | 1.5                   | 1.8            |
|                                                     | S2    | -307.5770 | -308.7557 | 3.8                   | 2.6                   | 3.0            |
|                                                     | S3    | -307.5010 | -308.6569 | 5.8                   | 5.3                   | 5.8            |
|                                                     | T1    | -307.6620 | -308.8127 | 1.5                   | 1.1                   | —              |
|                                                     | T2    | -307.5738 | -308.7088 | 3.9                   | 3.9                   | —              |
|                                                     | T3    | -307.5717 | -308.7087 | 3.9                   | 3.9                   | —              |
|                                                     | T4    | -307.5180 | -308.6620 | 5.4                   | 5.2                   | —              |
| Heptafulvene                                        | S0    | -307.7448 | -308.8899 | 0.0                   | 0.0                   | —              |
|                                                     | S1    | -307.6094 | -308.7800 | 3.7                   | 3.0                   | —              |
|                                                     | S2    | -307.5572 | -308.7069 | 5.1                   | 5.0                   | —              |
|                                                     | S3    | -307.5222 | -308.6820 | 6.1                   | 5.7                   | —              |
|                                                     | T1    | -307.6672 | -308.8133 | 2.1                   | 2.1                   | —              |
|                                                     | T2    | -307.6393 | -308.7818 | 2.9                   | 2.9                   | —              |
|                                                     | T3    | -307.5680 | -308.7137 | 4.8                   | 4.8                   | —              |
|                                                     | T4    | -307.5640 | -308.7068 | 4.9                   | 5.0                   | —              |

**Figure S1.** State Average CASSCF orbitals and electron occupations for benzene in singlet states.

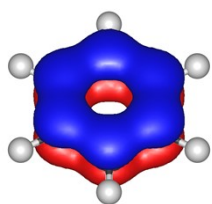

-12.9 eV

1.83 |e|

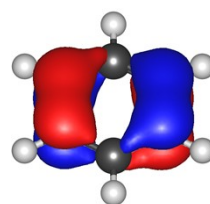

-8.1 eV

1.64 |e|

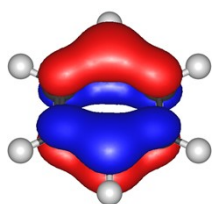

-7.6 eV

1.50 |e|

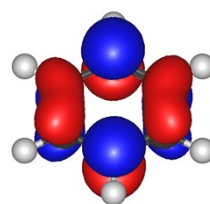

2.0 eV

0.58 |e|

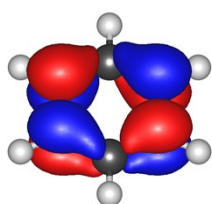

2.9 eV

0.36 |e|

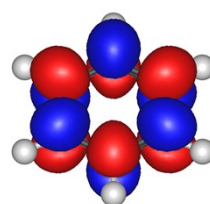

9.9 eV

0.10 |e|

**Figure S2.** State Average CASSCF orbitals and electron occupations for fulvene in singlet states.

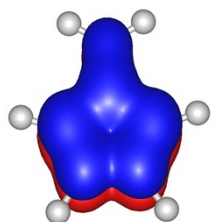

-12.8 eV

1.83 |e|

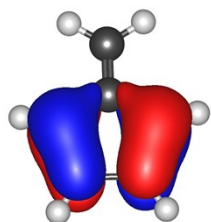

-6.6 eV

1.49 |e|

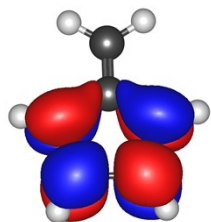

6.8 eV

0.15 |e|

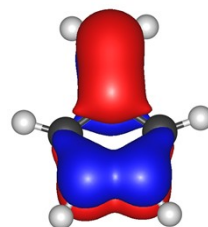

-7.8 eV

1.52 |e|

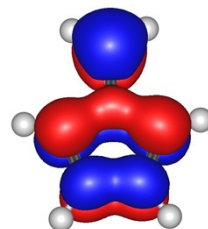

-0.9 eV

0.89 |e|

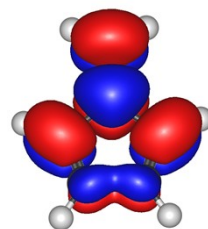

7.9 eV

0.12 |e|

**Figure S3.** State Average CASSCF orbitals and electron occupations for benzene in triplet states.

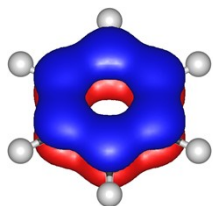

-12.9 eV

1.93 |e|

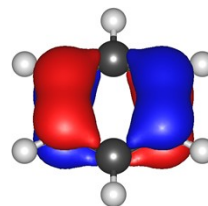

-7.6 eV

1.47 |e|

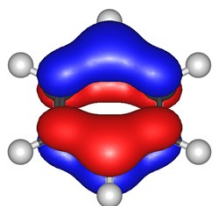

-7.6 eV

1.47 |e|

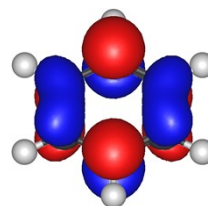

2.3 eV

0.54 |e|

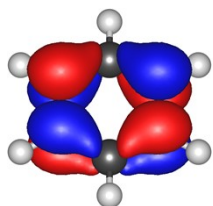

2.3 eV

0.54 |e|

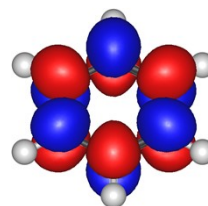

10.3 eV

0.06 |e|

**Figure S4.** State Average CASSCF orbitals and electron occupations for fulvene in triplet states.

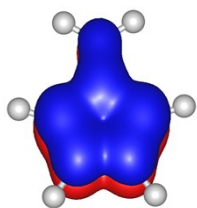

-12.7 eV

1.81 |e|

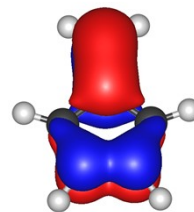

-7.7 eV

1.49 |e|

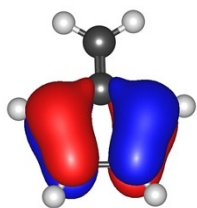

-6.2 eV

1.37 |e|

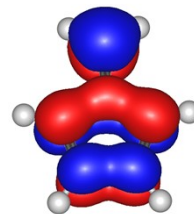

-0.7 eV

0.88 |e|

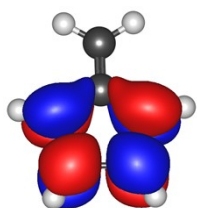

6.3 eV

0.23 |e|

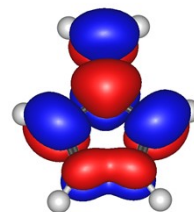

7.4 eV

0.21 |e|

**Figure S5.** State Average CASSCF orbitals and electron occupations for cyclobutadiene at  $D_{4h}$  symmetry in singlet states.

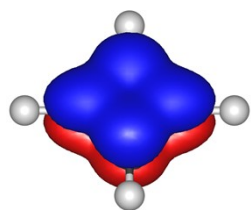

-12.6 eV

1.89 |e|

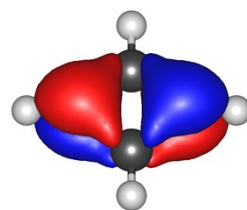

-3.0 eV

1.01 |e|

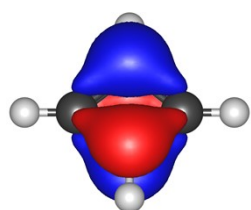

-1.8 eV

0.85 |e|

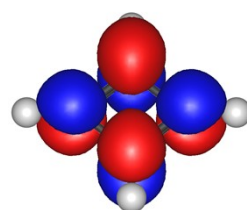

6.2 eV

0.25 |e|



**Figure S6.** State Average CASSCF orbitals and electron occupations for triafulvene in singlet states.

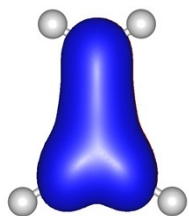

-12.7 eV

1.77 |e|

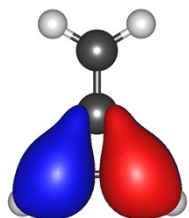

1.7 eV

0.54 |e|

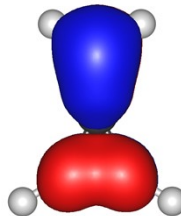

-6.0 eV

1.30 |e|

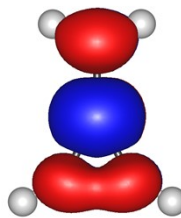

4.4 eV

0.38 |e|

**Figure S7.** State Average CASSCF orbitals and electron occupations for cyclobutadiene at  $D_{4h}$  symmetry in triplet states.

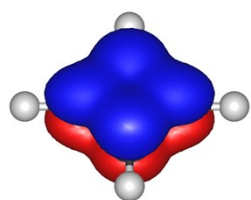

-11.5 eV

1.60 |e|

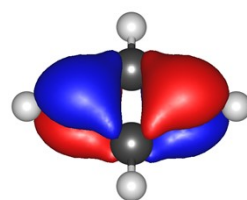

-2.8 eV

1.00 |e|

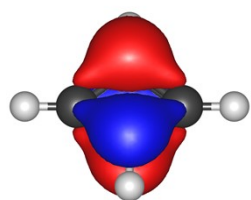

-2.0 eV

0.95 |e|

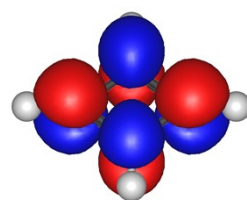

5.4 eV

0.45 |e|

**Figure S8.** State Average CASSCF orbitals and electron occupations for triafulvene in triplet states.

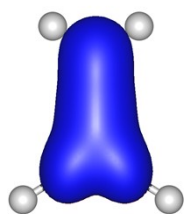

-9.9 eV

1.50 |e|

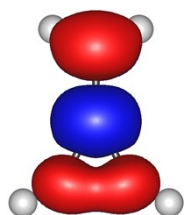

3.6 eV

0.54 |e|

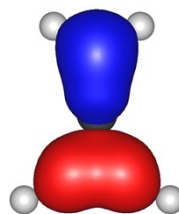

-6.5 eV

1.44 |e|

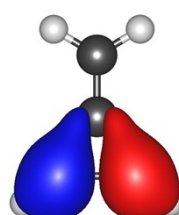

1.8 eV

0.52 |e|

**Figure S9.** State Average CASSCF orbitals and electron occupations for cyclobutadiene at  $D_{2h}$  symmetry in singlet states.

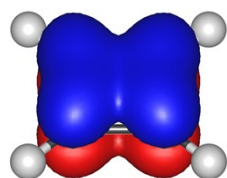

-12.3 eV

1.83 |e|

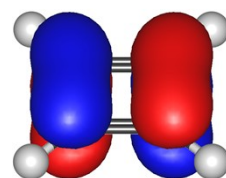

-4.4 eV

1.13 |e|

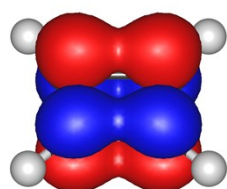

-0.75 eV

0.83 |e|

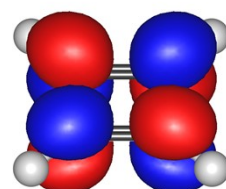

6.2 eV

0.22 |e|

**Figure S10.** State Average CASSCF orbitals and electron occupations for cyclobutadiene at  $D_{2h}$  symmetry in triplet states.

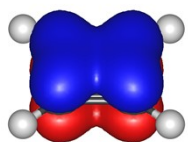

-11.2 eV

1.57 |e|

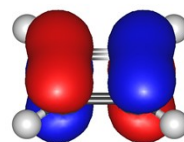

-4.3 eV

1.14 |e|

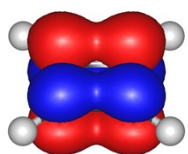

-0.8 eV

0.85 |e|

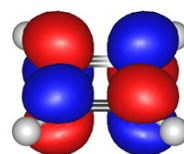

5.5 eV

0.44 |e|

**Figure S11.** State Average CASSCF orbitals and electron occupations for cyclooctatetraene at  $D_{8h}$  symmetry in singlet states.

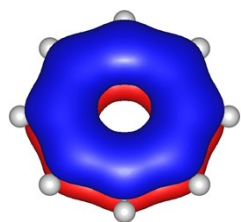

-12.8 eV

1.92 |e|

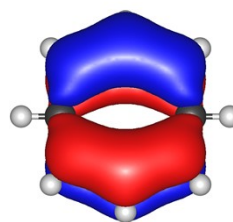

-10.3 eV

1.84 |e|

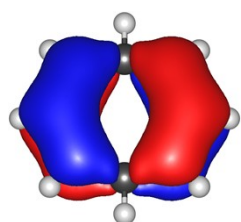

-10.3 eV

1.82 |e|

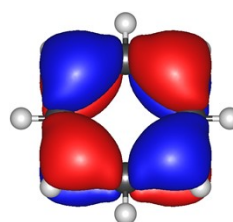

-4.3 eV

1.07 |e|

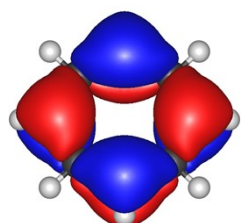

-2.3 eV

1.06 |e|

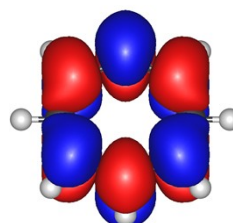

6.1 eV

0.12 |e|

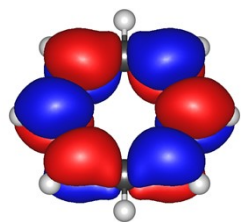

6.1 eV

0.12 |e|

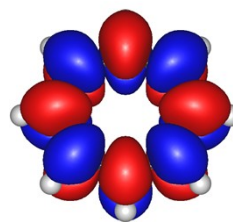

11.2 eV

0.05 |e|

**Figure S12.** State Average CASSCF orbitals and electron occupations for heptafulvene in singlet states.

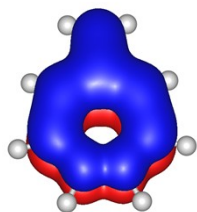

-13.0 eV

1.91 |e|

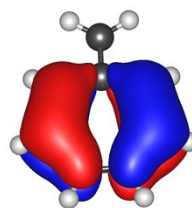

-10.2

1.81 |e|

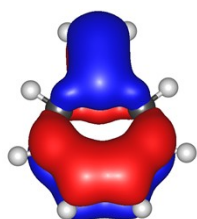

-9.6 eV

1.79 |e|

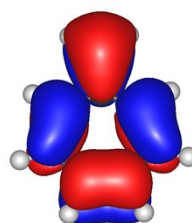

-4.6 eV

1.18 |e|

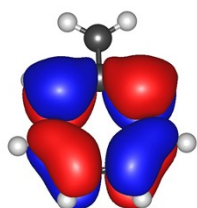

-0.5 eV

0.83 |e|

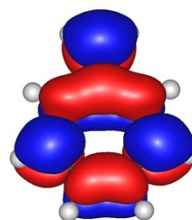

2.7 eV

0.30 |e|

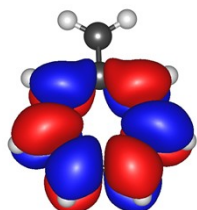

8.8 eV

0.11 |e|

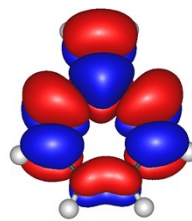

9.7 eV

0.08 |e|

**Figure S13.** State Average CASSCF orbitals and electron occupations for cyclooctatetraene at  $D_{8h}$  symmetry in triplet states.

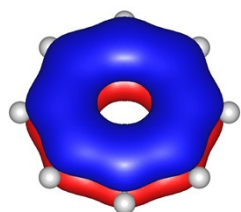

-12.5 eV

1.91 |e|

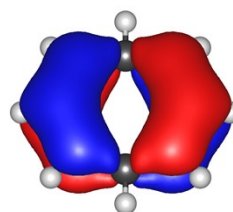

-10.1 eV

1.68 |e|

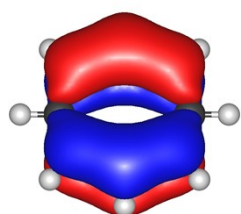

-9.6 eV

1.67 |e|

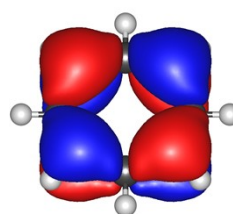

-4.6 eV

1.14 |e|

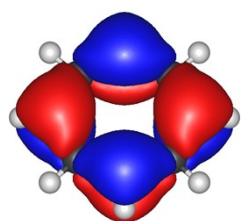

-2.0 eV

1.11 |e|

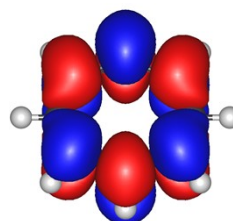

5.5 eV

0.22 |e|

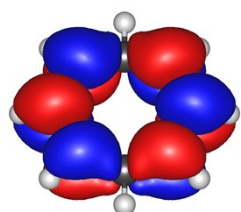

5.9 eV

0.20 |e|

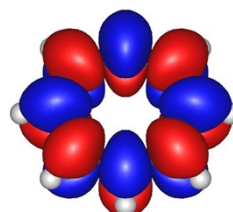

10.8 eV

0.07 |e|



**Figure S14.** State Average CASSCF orbitals and electron occupations for heptafulvene in triplet states.

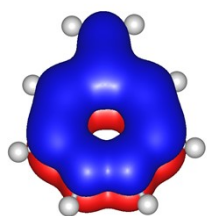

-12.9 eV

1.91 |e|

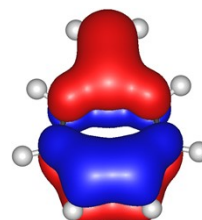

-10.0 eV

1.81 |e|

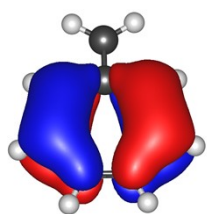

9.3 eV

1.79 |e|

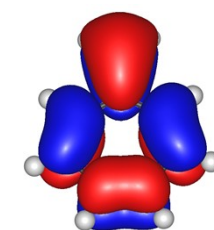

5.0 eV

1.18 |e|

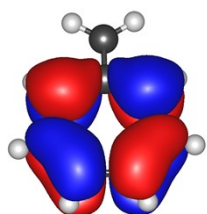

0.14 eV

0.83 |e|

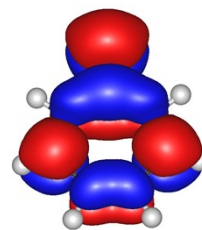

2.1 eV

0.30 |e|

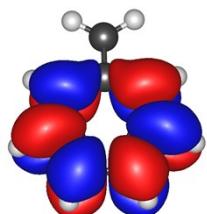

8.9 eV

0.11 |e|

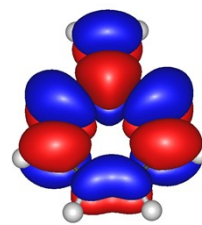

9.3 eV

0.08 |e|

**Figure S15.** State Average CASSCF orbitals and electron occupations for cyclooctatetraene at  $D_{4h}$  symmetry in singlet states.

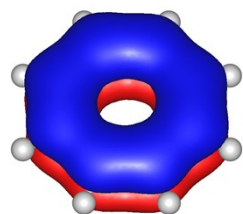

-12.8 eV

1.92 |e|

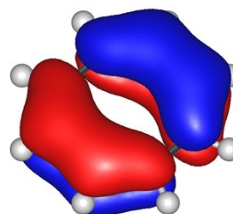

-10.3 eV

1.85 |e|

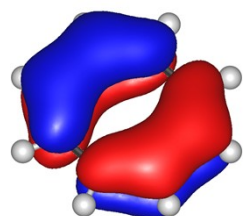

-10.3 eV

1.80 |e|

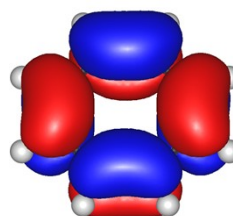

-3.4 eV

1.12 |e|

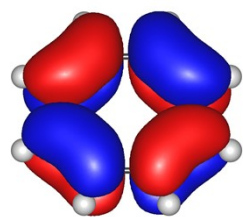

-3.2 eV

1.02 |e|

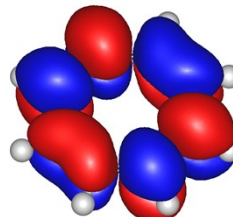

6.0 eV

0.12 |e|

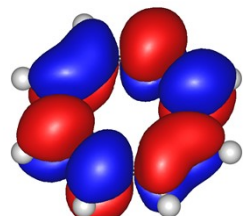

6.1 eV

0.12 |e|

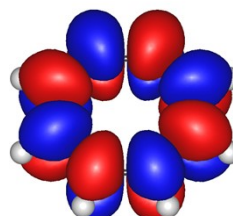

11.3 eV

0.05 |e|

**Figure S16.** State Average CASSCF orbitals and electron occupations for cyclooctatetraene at  $D_{4h}$  symmetry in triplet states.

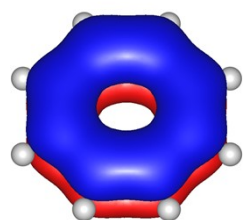

-12.5 eV

1.90 |e|

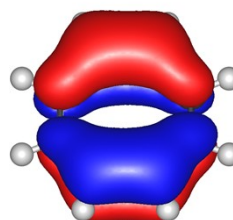

-9.8 eV

1.75 |e|

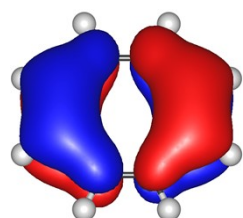

-9.8 eV

1.61 |e|

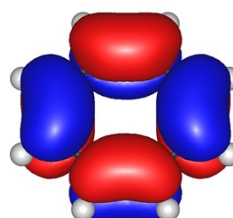

-3.4 eV

1.26 |e|

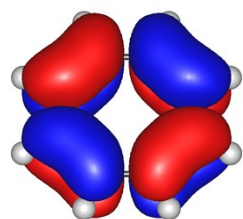

-3.2 eV

0.98 |e|

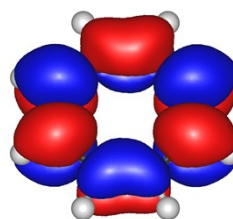

5.6 eV

0.25 |e|

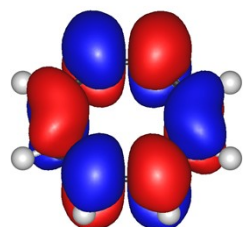

5.8 eV

0.18 |e|

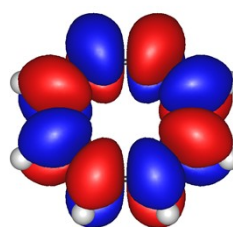

10.9 eV

0.08 |e|

**Figure S17.** Isomerization stabilization reactions under the fulvenization approach for non-aromatic systems at the PBE0/def2-TZVP level.

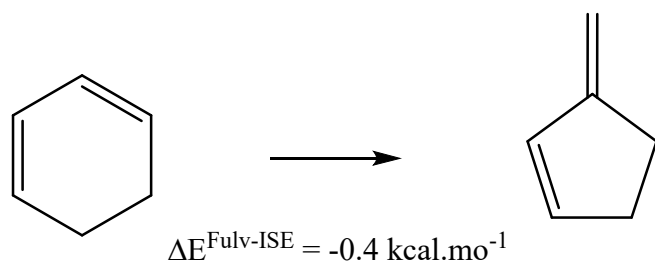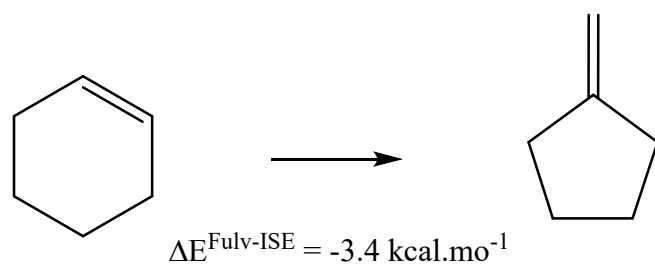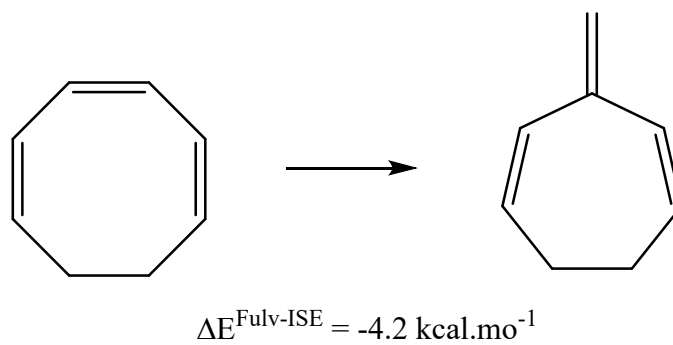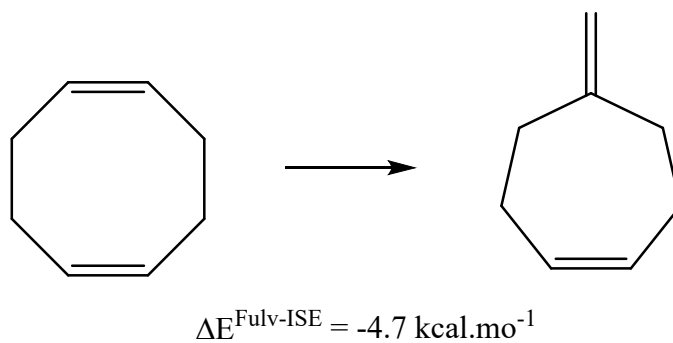

**Table S4.** Weight and configurations of the ground and excited states of benzene.

| C <sub>6</sub> H <sub>6</sub> |        |                |        |                |        |                |        |
|-------------------------------|--------|----------------|--------|----------------|--------|----------------|--------|
| S <sub>0</sub>                |        | S <sub>1</sub> |        | S <sub>2</sub> |        | S <sub>3</sub> |        |
| 0.89029                       | 222000 | 0.41231        | 212100 | 0.50627        | 221100 | 0.33823        | 122100 |
| 0.03059                       | 211110 | 0.38843        | 221010 | 0.44078        | 212010 | 0.20505        | 220200 |
| 0.02062                       | 220200 | 0.05238        | 121110 | 0.01273        | 112110 | 0.12978        | 221001 |
| 0.02022                       | 202020 | 0.04044        | 211101 | 0.01149        | 121200 | 0.11567        | 211110 |
| 0.01170                       | 121101 | 0.02193        | 112020 | 0.00689        | 121020 | 0.03742        | 202200 |
| 0.01165                       | 112011 | 0.01903        | 112200 | 0.00338        | 111111 | 0.01785        | 220020 |
|                               |        | 0.01747        | 202011 | 0.00326        | 220101 | 0.01525        | 111210 |
|                               |        | 0.01561        | 220011 | 0.00324        | 211011 | 0.01490        | 112011 |
|                               |        | 0.00638        | 012120 |                |        | 0.01449        | 210111 |
|                               |        | 0.00523        | 021210 |                |        | 0.01377        | 22020  |
|                               |        | 0.00422        | 201012 |                |        | 0.01302        | 121101 |
|                               |        | 0.00391        | 210102 |                |        | 0.01130        | 202020 |
|                               |        |                |        |                |        | 0.01089        | 120120 |
|                               |        |                |        |                |        | 0.01045        | 22200  |
|                               |        |                |        |                |        | 0.00837        | 202002 |
|                               |        |                |        |                |        | 0.00764        | 201201 |
|                               |        |                |        |                |        | 0.00699        | 220002 |
|                               |        |                |        |                |        | 0.00507        | 012111 |
|                               |        |                |        |                |        | 0.00294        | 211200 |
|                               |        |                |        |                |        | 0.00255        | 111012 |
| T <sub>1</sub>                |        | T <sub>2</sub> |        | T <sub>3</sub> |        | T <sub>4</sub> |        |
| 0.4399                        | 221100 | 0.42345        | 212010 | 0.42338        | 221010 | 0.48856        | 212100 |
| 0.43975                       | 212010 | 0.42331        | 221100 | 0.42338        | 212100 | 0.48855        | 221010 |
| 0.0348                        | 122001 | 0.05322        | 112110 | 0.05322        | 121110 | 0.00536        | 201210 |
| 0.01801                       | 111111 | 0.03977        | 211011 | 0.03977        | 211101 | 0.00536        | 210120 |
| 0.01438                       | 201120 | 0.01374        | 121200 | 0.01374        | 112020 |                |        |
| 0.01438                       | 210210 | 0.01259        | 220101 | 0.01259        | 202011 |                |        |
| 0.00634                       | 211011 | 0.01050        | 111111 | 0.00359        | 102111 |                |        |
| 0.00537                       | 112110 | 0.00257        | 012210 | 0.00344        | 111021 |                |        |
| 0.00379                       | 120201 | 0.00257        | 021120 | 0.00263        | 120111 |                |        |
| 0.00379                       | 102021 |                |        | 0.00257        | 021210 |                |        |
| 0.00317                       | 220101 |                |        | 0.00257        | 012120 |                |        |
| 0.00317                       | 202101 |                |        |                |        |                |        |
| 0.00268                       | 121200 |                |        |                |        |                |        |
| 0.00268                       | 121020 |                |        |                |        |                |        |

**Table S5.** Weight and configurations of the ground and excited states of fulvene.

| Fulvene        |        |                |        |                |        |                |        |
|----------------|--------|----------------|--------|----------------|--------|----------------|--------|
| S <sub>0</sub> |        | S <sub>1</sub> |        | S <sub>2</sub> |        | S <sub>3</sub> |        |
| 0.823          | 222000 | 0.6567         | 221100 | 0.2251         | 122100 | 0.42774        | 212100 |
| 0.0409         | 212100 | 0.13596        | 211200 | 0.18712        | 220200 | 0.22866        | 202200 |
| 0.01864        | 202200 | 0.05825        | 221001 | 0.12559        | 212100 | 0.07773        | 122100 |
| 0.01671        | 121110 | 0.03797        | 121200 | 0.10997        | 221010 | 0.05046        | 212001 |
| 0.01481        | 211110 | 0.03386        | 211101 | 0.05621        | 112200 | 0.02728        | 211011 |
| 0.01415        | 220200 | 0.01068        | 202110 | 0.05524        | 211110 | 0.02585        | 222000 |
| 0.00996        | 202101 | 0.01062        | 112110 | 0.05298        | 220101 | 0.02356        | 221010 |
| 0.00966        | 112101 | 0.00485        | 201120 | 0.05064        | 202200 | 0.0191         | 22200  |
| 0.0092         | 220101 | 0.00454        | 210210 | 0.02661        | 220020 | 0.01438        | 111210 |
| 0.00603        | 220020 | 0.00394        | 121002 | 0.00983        | 121110 | 0.01029        | 202002 |
| 0.00336        | 221010 | 0.00372        | 211020 | 0.00946        | 201210 | 0.00994        | 122001 |
| 0.00335        | 202002 | 0.00321        | 211002 | 0.0083         | 112020 | 0.00989        | 121110 |
| 0.00327        | 121011 | 0.00313        | 111120 | 0.00829        | 210120 | 0.00788        | 112101 |
| 0.0026         | 112002 | 0.00275        | 210111 | 0.00732        | 121011 | 0.00748        | 220200 |
|                |        | 0.00254        | 202011 | 0.00662        | 22101  | 0.00627        | 201210 |
|                |        |                |        | 0.00531        | 112101 | 0.00598        | 112200 |
|                |        |                |        | 0.00504        | 210201 | 0.0052         | 201111 |
|                |        |                |        | 0.00463        | 111111 | 0.00487        | 211110 |
|                |        |                |        | 0.00456        | 202020 | 0.00318        | 210120 |
|                |        |                |        | 0.00385        | 212001 | 0.00286        | 021210 |
|                |        |                |        | 0.00367        | 211011 | 0.00282        | 200220 |
|                |        |                |        | 0.00312        | 222000 | 0.00253        | 111111 |
| T <sub>1</sub> |        | T <sub>2</sub> |        | T <sub>3</sub> |        | T <sub>4</sub> |        |
| 0.80371        | 221100 | 0.78701        | 212100 | 0.36988        | 221010 | 0.4595         | 211200 |
| 0.02996        | 122010 | 0.04662        | 212001 | 0.33871        | 122100 | 0.23465        | 221001 |
| 0.02586        | 221001 | 0.04657        | 221010 | 0.12215        | 212001 | 0.06792        | 211101 |
| 0.02346        | 211200 | 0.01933        | 122001 | 0.03140        | 211110 | 0.0526         | 122010 |
| 0.01781        | 212010 | 0.01245        | 211110 | 0.02033        | 212100 | 0.03591        | 112110 |
| 0.01556        | 211101 | 0.01039        | 210120 | 0.01177        | 112101 | 0.01767        | 211002 |
| 0.01109        | 121101 | 0.00895        | 111111 | 0.01069        | 201210 | 0.01713        | 212010 |
| 0.00741        | 220110 | 0.00752        | 121110 | 0.01029        | 111111 | 0.01674        | 220110 |
| 0.00591        | 201102 | 0.00745        | 111210 | 0.00769        | 120120 | 0.01204        | 121101 |
| 0.00553        | 112110 | 0.00654        | 122100 | 0.00632        | 201111 | 0.00834        | 120210 |
| 0.00537        | 201201 | 0.00554        | 210201 | 0.00610        | 202101 | 0.00762        | 111201 |
| 0.00536        | 202110 | 0.00544        | 112101 | 0.00591        | 210201 | 0.00674        | 201201 |
| 0.00434        | 210210 | 0.00495        | 112200 | 0.00573        | 220101 | 0.00596        | 112011 |
| 0.00414        | 111120 | 0.00466        | 211011 | 0.00504        | 111210 | 0.00555        | 211020 |
| 0.00401        | 120210 | 0.00363        | 210102 | 0.00498        | 121011 | 0.00507        | 121200 |
| 0.00301        | 021120 | 0.00272        | 102201 | 0.00477        | 122001 | 0.00500        | 120111 |
| 0.00300        | 201120 | 0.00270        | 201210 | 0.00452        | 21210  | 0.00431        | 202110 |
| 0.00298        | 111102 |                |        | 0.00363        | 211011 | 0.00364        | 210111 |

**Table S6.** Weight and configurations of the ground and excited states of cyclobutadiene ( $D_{4h}$ ).

| $C_4H_4 (D_{4h})$ |      |         |      |         |      |         |       |
|-------------------|------|---------|------|---------|------|---------|-------|
| $S_0$             |      | $S_1$   |      | $S_2$   |      | $S_3$   |       |
| 0.92936           | 2110 | 0.76729 | 2200 | 0.79554 | 2020 | 0.76938 | 2101  |
| 0.06312           | 1111 | 0.12024 | 2020 | 0.17316 | 2200 | 0.22313 | 1120  |
| 0.00752           | 0112 | 0.04859 | 0220 | 0.01464 | 2002 | 0.00707 | 1102  |
|                   |      | 0.04134 | 2002 | 0.01142 | 0220 |         |       |
|                   |      | 0.01628 | 1201 |         |      |         |       |
|                   |      | 0.00601 | 1021 |         |      |         |       |
| $T_1$             |      | $T_2$   |      | $T_3$   |      | $T_4$   |       |
| 0.92741           | 2110 | 0.57771 | 2101 | 0.49069 | 1210 | 0.51699 | 2011  |
| 0.06695           | 1111 | 0.35985 | 1120 | 0.44749 | 2011 | 0.47572 | 1210  |
| 0.00565           | 1120 | 0.03277 | 0121 | 0.03174 | 1012 | 0.00448 | 00211 |
|                   |      | 0.02967 | 1102 | 0.03008 | 0211 | 0.00281 | 1012  |

**Table S7.** Weight and configurations of the ground and excited states of cyclobutadiene ( $D_{2h}$ ).

| $C_4H_4 (D_{2h})$ |      |         |      |         |      |         |      |
|-------------------|------|---------|------|---------|------|---------|------|
| $S_0$             |      | $S_1$   |      | $S_2$   |      | $S_3$   |      |
| 0.89013           | 2200 | 0.997   | 2110 | 0.78332 | 2020 | 0.60148 | 2101 |
| 0.0467            | 2020 |         |      | 0.0627  | 0220 | 0.39583 | 1210 |
| 0.04139           | 1111 |         |      | 0.05816 | 1111 | 0.00257 | 1012 |
| 0.00904           | 2002 |         |      | 0.05482 | 2002 |         |      |
| 0.00784           | 0220 |         |      | 0.03491 | 2200 |         |      |
| 0.00304           | 0202 |         |      | 0.00543 | 0202 |         |      |
| $T_1$             |      | $T_2$   |      | $T_3$   |      | $T_4$   |      |
| 0.91678           | 2110 | 0.50882 | 2101 | 0.46236 | 2011 | 0.52807 | 1210 |
| 0.0546            | 1201 | 0.44796 | 1210 | 0.4407  | 1120 | 0.46871 | 2101 |
| 0.02269           | 1021 | 0.02172 | 1012 | 0.04993 | 0211 |         |      |
| 0.00593           | 0112 | 0.0215  | 0121 | 0.047   | 1102 |         |      |



**Table S8.** Weight and configurations of the ground and excited states of triafulvene.

| Triafulvene    |      |                |      |                |      |                |      |
|----------------|------|----------------|------|----------------|------|----------------|------|
| S <sub>0</sub> |      | S <sub>1</sub> |      | S <sub>2</sub> |      | S <sub>3</sub> |      |
| 0.88434        | 2200 | 0.80037        | 2110 | 0.80863        | 2101 | 0.45427        | 1210 |
| 0.07098        | 2101 | 0.08762        | 1210 | 0.08773        | 2200 | 0.25359        | 2011 |
| 0.01309        | 1120 | 0.07496        | 2011 | 0.0291         | 1102 | 0.17707        | 2110 |
| 0.00851        | 2020 | 0.01597        | 0211 | 0.02875        | 2020 | 0.06302        | 211  |
| 0.00712        | 1102 | 0.01228        | 1111 | 0.0188         | 1201 | 0.02906        | 1111 |
| 0.00605        | 2002 | 0.00748        | 0112 | 0.00858        | 0121 | 0.02286        | 1012 |
| 0.00458        | 0202 |                |      | 0.00766        | 1120 |                |      |
| 0.00343        | 0220 |                |      | 0.00472        | 1021 |                |      |
|                |      |                |      | 0.00341        | 2002 |                |      |
| T <sub>1</sub> |      | T <sub>2</sub> |      | T <sub>3</sub> |      | T <sub>4</sub> |      |
| 0.92918        | 2101 | 0.64946        | 2110 | 0.65219        | 1201 | 0.57603        | 1210 |
| 0.05188        | 1111 | 0.3028         | 1210 | 0.20829        | 2011 | 0.34623        | 2110 |
| 0.01307        | 0121 | 0.01941        | 1012 | 0.09089        | 1111 | 0.03608        | 1120 |
| 0.00436        | 2011 | 0.01307        | 1102 | 0.02585        | 1021 | 0.02695        | 1102 |
|                |      | 0.01005        | 1120 | 0.0167         | 0211 | 0.01338        | 1012 |
|                |      | 0.0052         | 0112 | 0.00499        | 2101 |                |      |

**Table S9.** Weight and configurations of the ground and excited states of cyclooctatetraene ( $D_{8h}$ ).

| $C_8H_8 (D_{8h})$ |          |         |          |         |          |         |          |
|-------------------|----------|---------|----------|---------|----------|---------|----------|
| $S_0$             | $S_1$    | $S_2$   | $S_3$    |         |          |         |          |
| 0.80832           | 22211000 | 0.46301 | 22220000 | 0.53687 | 22202000 | 0.2652  | 22121000 |
| 0.04871           | 21211100 | 0.31796 | 22202000 | 0.39834 | 22220000 | 0.22959 | 21212000 |
| 0.04705           | 22111010 | 0.02817 | 20222000 | 0.01181 | 21211010 | 0.10815 | 22201010 |
| 0.02085           | 12211001 | 0.02696 | 22022000 | 0.01096 | 22111100 | 0.10614 | 22210100 |
| 0.00796           | 21111110 | 0.01647 | 22200200 | 0.00274 | 12112100 | 0.06932 | 12122000 |
| 0.00778           | 20211200 | 0.0148  | 22200020 |         |          | 0.02637 | 21121100 |
| 0.0075            | 22011020 | 0.01348 | 22111100 |         |          | 0.01752 | 22200011 |
| 0.00635           | 12111011 | 0.01236 | 21211010 |         |          | 0.01562 | 21201110 |
| 0.00598           | 11211101 | 0.00756 | 12121010 |         |          | 0.01    | 12211100 |
|                   |          | 0.00716 | 11221100 |         |          | 0.00972 | 20212100 |
|                   |          | 0.00679 | 11212010 |         |          | 0.00824 | 21112010 |
|                   |          | 0.00584 | 02222000 |         |          | 0.00823 | 22110110 |
|                   |          | 0.0056  | 21112001 |         |          | 0.0081  | 21211001 |
|                   |          | 0.00554 | 12112100 |         |          | 0.00763 | 21111011 |
|                   |          | 0.00488 | 12210110 |         |          | 0.0069  | 12111110 |
|                   |          | 0.00438 | 22110101 |         |          | 0.00612 | 02221010 |
|                   |          | 0.0041  | 21210011 |         |          | 0.00583 | 22012100 |
|                   |          | 0.00361 | 21201101 |         |          | 0.00513 | 21210020 |
|                   |          | 0.00337 | 22101011 |         |          | 0.0051  | 02212100 |
|                   |          | 0.00333 | 22021001 |         |          | 0.00406 | 12220010 |
|                   |          | 0.00281 | 12201020 |         |          | 0.00348 | 22102001 |
|                   |          | 0.00279 | 20221001 |         |          | 0.00339 | 22120001 |
|                   |          |         |          |         |          | 0.00336 | 11211020 |
|                   |          |         |          |         |          | 0.00285 | 12202010 |
|                   |          |         |          |         |          | 0.0028  | 21210200 |
|                   |          |         |          |         |          | 0.00276 | 11211200 |
|                   |          |         |          |         |          | 0.00272 | 22011101 |
|                   |          |         |          |         |          | 0.00262 | 12121001 |
|                   |          |         |          |         |          | 0.0026  | 11212001 |
|                   |          |         |          |         |          | 0.00259 | 20121200 |
|                   |          |         |          |         |          | 0.00253 | 22101002 |
| $T_1$             | $T_2$    | $T_3$   | $T_4$    |         |          |         |          |
| 0.80955           | 22211000 | 0.29506 | 21221000 | 0.30838 | 22121000 | 0.26332 | 22112000 |
| 0.04507           | 22111100 | 0.25854 | 22112000 | 0.24409 | 21212000 | 0.24971 | 21221000 |
| 0.04425           | 21211010 | 0.11607 | 22201010 | 0.12378 | 22201100 | 0.13927 | 22210100 |
| 0.01499           | 12211001 | 0.11264 | 22210100 | 0.10434 | 22210010 | 0.10887 | 22201010 |
| 0.01028           | 21122000 | 0.03200 | 12211100 | 0.03347 | 12211010 | 0.04903 | 12211100 |
| 0.00768           | 22200110 | 0.02122 | 22111001 | 0.02404 | 21211001 | 0.03218 | 22111001 |
| 0.00703           | 21111110 | 0.00949 | 11211110 | 0.01014 | 22021100 | 0.01504 | 21112010 |
| 0.00561           | 11211011 | 0.00881 | 21111011 | 0.00972 | 12111110 | 0.01379 | 20221010 |

---

|         |          |         |          |         |          |         |          |
|---------|----------|---------|----------|---------|----------|---------|----------|
| 0.00542 | 12111101 | 0.00849 | 20221010 | 0.00904 | 21111101 | 0.01125 | 21201020 |
| 0.00535 | 22011200 | 0.00819 | 12220010 | 0.00836 | 12220100 | 0.0096  | 11211110 |
| 0.00526 | 20211020 | 0.00779 | 12202010 | 0.00777 | 22101200 | 0.00793 | 21210110 |
| 0.00261 | 21121001 | 0.00762 | 21201020 | 0.0071  | 12202100 | 0.00766 | 21111011 |
|         |          | 0.00716 | 21112010 | 0.00644 | 22110110 | 0.00627 | 22110200 |
|         |          | 0.00646 | 21220001 | 0.00633 | 21112100 | 0.00627 | 21121100 |
|         |          | 0.00631 | 21210110 | 0.00506 | 22102001 | 0.00618 | 11222000 |
|         |          | 0.00505 | 21202001 | 0.00504 | 21201110 | 0.00556 | 22012100 |
|         |          | 0.00499 | 21121100 | 0.0048  | 22120001 | 0.00449 | 12112001 |
|         |          | 0.00498 | 22101110 | 0.00465 | 21121010 | 0.00427 | 11221001 |
|         |          | 0.00434 | 11122100 | 0.00439 | 11122010 | 0.00325 | 22101110 |
|         |          | 0.00375 | 12111200 | 0.0036  | 11211020 | 0.00314 | 12111200 |
|         |          | 0.00362 | 22110200 | 0.00335 | 21210200 | 0.00272 | 12210101 |
|         |          | 0.00329 | 22110020 | 0.00320 | 20122001 | 0.00254 | 22011101 |
|         |          | 0.00326 | 21022001 | 0.00300 | 20211011 |         |          |
|         |          | 0.00301 | 22011101 | 0.00299 | 22012010 |         |          |
|         |          | 0.00298 | 20212100 | 0.00296 | 21210020 |         |          |
|         |          | 0.00261 | 22012100 | 0.00264 | 20212010 |         |          |

---

**Table S10.** Weight and configurations of the ground and excited states of cyclooctatetraene ( $D_{4h}$ ).

| $C_8H_8 (D_{4h})$ |          |         |          |         |          |         |          |
|-------------------|----------|---------|----------|---------|----------|---------|----------|
| $S_0$             |          | $S_1$   |          | $S_2$   |          | $S_3$   |          |
| 0.78656           | 22220000 | 0.71227 | 22202000 | 0.93596 | 22211000 | 0.32485 | 22121000 |
| 0.03917           | 22202000 | 0.03552 | 22220000 | 0.01145 | 21211100 | 0.18228 | 21212000 |
| 0.02851           | 21211010 | 0.02819 | 21211010 | 0.01046 | 22111010 | 0.11481 | 22210100 |
| 0.02832           | 22111100 | 0.02486 | 22111100 | 0.00339 | 21111110 | 0.09219 | 22201010 |
| 0.01323           | 12211001 | 0.02456 | 20222000 | 0.00334 | 12111101 | 0.06476 | 12122000 |
| 0.00673           | 21120110 | 0.02346 | 22022000 | 0.00312 | 20211020 | 0.01878 | 21112010 |
| 0.00660           | 11221100 | 0.01351 | 22200020 | 0.00308 | 11211011 | 0.01648 | 22200101 |
| 0.00619           | 21220100 | 0.01171 | 22200200 | 0.00307 | 22011200 | 0.01351 | 20221010 |
| 0.00611           | 22120010 | 0.00974 | 12211001 |         |          | 0.01121 | 21121100 |
| 0.00576           | 21121001 | 0.00810 | 12112100 |         |          | 0.0107  | 22110110 |
| 0.00527           | 12121010 | 0.00644 | 22102010 |         |          | 0.0105  | 21201110 |
| 0.00485           | 12210110 | 0.00613 | 11212010 |         |          | 0.00788 | 22021010 |
| 0.00483           | 20222000 | 0.00541 | 21202100 |         |          | 0.0069  | 12211100 |
| 0.00465           | 22022000 | 0.00448 | 02222000 |         |          | 0.00663 | 12220010 |
| 0.0042            | 12120101 | 0.00435 | 11221100 |         |          | 0.00659 | 02221010 |
| 0.00418           | 11220011 | 0.00431 | 22120010 |         |          | 0.00644 | 22111001 |
| 0.00406           | 22110011 | 0.00419 | 12102101 |         |          | 0.00627 | 21210200 |
| 0.00374           | 12221000 | 0.00396 | 21102110 |         |          | 0.00617 | 12120200 |
| 0.0037            | 21210101 | 0.00393 | 22012001 |         |          | 0.00555 | 21220001 |
| 0.00321           | 22200020 | 0.0039  | 21220100 |         |          | 0.005   | 22020101 |
| 0.0032            | 22200200 | 0.00382 | 21201011 |         |          | 0.00477 | 21210020 |
| 0.00311           | 20220020 | 0.00367 | 22101101 |         |          | 0.0044  | 02212100 |
| 0.00304           | 22020200 | 0.00356 | 12121010 |         |          | 0.00394 | 21111101 |
|                   |          | 0.00327 | 11202011 |         |          | 0.00388 | 11202110 |
|                   |          | 0.00319 | 12201200 |         |          | 0.00357 | 12202010 |
|                   |          | 0.00315 | 20212001 |         |          | 0.0035  | 21102011 |
|                   |          | 0.00305 | 20202020 |         |          | 0.00292 | 12111110 |
|                   |          | 0.00301 | 22002200 |         |          | 0.00281 | 11221001 |
|                   |          | 0.00283 | 21121001 |         |          | 0.00281 | 21202001 |
|                   |          |         |          |         |          | 0.00264 | 21210002 |
| $T_1$             |          | $T_2$   |          | $T_3$   |          | $T_4$   |          |
| 0.79767           | 22211000 | 0.52249 | 22121000 | 0.50858 | 21221000 | 0.49842 | 22112000 |
| 0.03599           | 22120100 | 0.25100 | 22210100 | 0.22809 | 22210010 | 0.22054 | 22201100 |
| 0.0343            | 21220010 | 0.03064 | 12220100 | 0.04696 | 12220010 | 0.02591 | 22021100 |
| 0.01516           | 22102100 | 0.02049 | 21212000 | 0.03295 | 21220001 | 0.02220 | 22110200 |
| 0.01343           | 21202010 | 0.01963 | 22120001 | 0.02421 | 22112000 | 0.01991 | 12202010 |
| 0.01154           | 12220001 | 0.01684 | 12211010 | 0.01575 | 12211100 | 0.01542 | 21221000 |
| 0.00949           | 21122000 | 0.01212 | 21211001 | 0.01119 | 22111001 | 0.01530 | 21121010 |
| 0.0071            | 22200110 | 0.01064 | 22012100 | 0.00873 | 22201100 | 0.01421 | 12211100 |
| 0.00617           | 21111110 | 0.01004 | 22101200 | 0.00853 | 20212010 | 0.01395 | 21202001 |

|         |          |         |          |         |          |         |          |
|---------|----------|---------|----------|---------|----------|---------|----------|
| 0.00607 | 22011200 | 0.00575 | 21112010 | 0.00795 | 21201020 | 0.01288 | 12220010 |
| 0.00593 | 11211011 | 0.00565 | 22201010 | 0.00666 | 21112100 | 0.01127 | 22210010 |
| 0.00580 | 20211020 | 0.00430 | 21111011 | 0.00471 | 21111101 | 0.00940 | 12111110 |
| 0.00524 | 12202001 | 0.00410 | 11211110 | 0.00433 | 11211020 | 0.00922 | 21112100 |
| 0.00522 | 12111101 | 0.00394 | 21201110 | 0.00433 | 12111110 | 0.00884 | 22111001 |
| 0.00292 | 11212010 | 0.00393 | 11121011 | 0.00415 | 22101110 | 0.00837 | 21220001 |
|         |          | 0.00364 | 12111200 | 0.00414 | 21210110 | 0.00827 | 21210110 |
|         |          | 0.00360 | 12120110 | 0.00389 | 11220110 | 0.00798 | 21111101 |
|         |          | 0.00355 | 22110110 | 0.00371 | 20211011 | 0.00798 | 12121001 |
|         |          | 0.00346 | 22011101 | 0.00336 | 11212001 | 0.00695 | 22101110 |
|         |          | 0.00341 | 21120101 | 0.00325 | 10222010 | 0.00495 | 12210101 |
|         |          | 0.00333 | 12112001 | 0.00314 | 21120011 | 0.00415 | 11112011 |
|         |          | 0.00314 | 11122010 | 0.00306 | 21121010 | 0.00270 | 20112020 |
|         |          | 0.00300 | 21121100 | 0.00305 | 11121101 |         |          |
|         |          | 0.00275 | 20121020 | 0.00275 | 11122100 |         |          |
|         |          | 0.00264 | 12022100 | 0.00265 | 21021200 |         |          |
|         |          |         |          | 0.00265 | 21201200 |         |          |

---

**Table S11.** Weight and configurations of the ground and excited states of heptafulvene.

| Heptafulvene |                |                |                |                |          |         |          |
|--------------|----------------|----------------|----------------|----------------|----------|---------|----------|
|              | S <sub>0</sub> | S <sub>1</sub> | S <sub>2</sub> | S <sub>3</sub> |          |         |          |
| 0.74777      | 22220000       | 0.55302        | 22211000       | 0.32351        | 22202000 | 0.22452 | 22201100 |
| 0.03637      | 22210100       | 0.12486        | 22121000       | 0.18247        | 21221000 | 0.1814  | 22211000 |
| 0.02793      | 21221000       | 0.08098        | 22201100       | 0.15384        | 22210100 | 0.15037 | 22121000 |
| 0.02697      | 21211100       | 0.04134        | 22111100       | 0.06282        | 12212000 | 0.09776 | 22210010 |
| 0.01708      | 22202000       | 0.03246        | 22201001       | 0.02841        | 22210001 | 0.05668 | 21212000 |
| 0.01132      | 22111010       | 0.01865        | 12211100       | 0.01467        | 21211001 | 0.03689 | 22111100 |
| 0.01033      | 22200200       | 0.01411        | 12221000       | 0.0131         | 22022000 | 0.02058 | 21122000 |
| 0.00941      | 22110200       | 0.00881        | 22111001       | 0.01172        | 21121100 | 0.01935 | 22021100 |
| 0.00662      | 12210101       | 0.00669        | 21212000       | 0.01112        | 20221010 | 0.01884 | 22200110 |
| 0.00570      | 22112000       | 0.00658        | 21210200       | 0.01089        | 12112100 | 0.01882 | 12221000 |
| 0.00561      | 12211010       | 0.00544        | 20211200       | 0.01052        | 22110200 | 0.01279 | 22101200 |
| 0.00486      | 21211001       | 0.00470        | 22110110       | 0.00892        | 22200101 | 0.01194 | 21201110 |
| 0.00443      | 12120101       | 0.00464        | 21111110       | 0.00827        | 22220000 | 0.00926 | 11222000 |
| 0.0039       | 20222000       | 0.00429        | 21211010       | 0.00812        | 21210110 | 0.0077  | 22110110 |
| 0.00387      | 11221100       | 0.00347        | 22020110       | 0.00689        | 20222000 | 0.00632 | 21211010 |
| 0.00384      | 22110101       | 0.00324        | 22200110       | 0.00623        | 22200020 | 0.00586 | 21112100 |
| 0.00351      | 11221001       | 0.00320        | 21120200       | 0.00516        | 22120100 | 0.00544 | 21121010 |
| 0.00311      | 22020200       | 0.00305        | 21202100       | 0.0049         | 21211100 | 0.00542 | 12121001 |
| 0.00296      | 20221010       | 0.00291        | 20221100       | 0.0044         | 21120110 | 0.00514 | 12211001 |
| 0.00291      | 21210110       | 0.0027         | 21112100       | 0.00437        | 12211010 | 0.00503 | 22111001 |
| 0.00283      | 20220200       |                |                | 0.00382        | 21201200 | 0.00448 | 12111101 |
| 0.00268      | 22210001       |                |                | 0.00367        | 21201020 | 0.00424 | 20212010 |
| 0.00251      | 21121100       |                |                | 0.00366        | 20220200 | 0.00411 | 21210020 |
|              |                |                |                | 0.00361        | 12122000 | 0.00325 | 21111110 |
|              |                |                |                | 0.00354        | 11221100 | 0.00309 | 22020110 |
|              |                |                |                | 0.0035         | 21220010 | 0.00307 | 21120020 |
|              |                |                |                | 0.00295        | 12202100 | 0.00290 | 22011101 |
|              |                |                |                | 0.0028         | 22201010 | 0.00270 | 12201101 |
|              |                |                |                | 0.00255        | 21111200 |         |          |
|              | T <sub>1</sub> | T <sub>2</sub> | T <sub>3</sub> | T <sub>4</sub> |          |         |          |
| 0.69575      | 22211000       | 0.68311        | 22210100       | 0.47266        | 22121000 | 0.43551 | 21221000 |
| 0.05781      | 21221000       | 0.09067        | 22121000       | 0.0964         | 22210001 | 0.15455 | 22201100 |
| 0.02836      | 22201100       | 0.04373        | 21220100       | 0.08573        | 21220100 | 0.0783  | 22210010 |
| 0.0262       | 22120100       | 0.01538        | 12220001       | 0.07488        | 12220100 | 0.03181 | 21220010 |
| 0.01519      | 22120001       | 0.01167        | 22120010       | 0.04888        | 22210100 | 0.02881 | 12221000 |
| 0.01362      | 21211100       | 0.00937        | 22012100       | 0.02107        | 22111100 | 0.02666 | 22120100 |
| 0.01187      | 21220010       | 0.00752        | 22111100       | 0.01995        | 22101200 | 0.01698 | 21211100 |
| 0.00976      | 12220010       | 0.00724        | 21220001       | 0.01782        | 22120010 | 0.01605 | 12211100 |
| 0.00818      | 21201200       | 0.00692        | 12111101       | 0.00739        | 12220001 | 0.01478 | 22110200 |
| 0.00694      | 12211001       | 0.00624        | 21121100       | 0.00634        | 12111101 | 0.01349 | 22112000 |
| 0.00684      | 22112000       | 0.00602        | 21202100       | 0.00624        | 21211010 | 0.01085 | 21201200 |

---

|         |          |         |          |         |          |         |          |
|---------|----------|---------|----------|---------|----------|---------|----------|
| 0.006   | 22111010 | 0.00578 | 20212100 | 0.00596 | 12210101 | 0.00865 | 22021100 |
| 0.00545 | 22102100 | 0.00559 | 21211010 | 0.00575 | 12212000 | 0.00784 | 21210110 |
| 0.0052  | 12221000 | 0.00478 | 22101200 | 0.00507 | 12121100 | 0.00708 | 21211001 |
| 0.00486 | 20211200 | 0.00408 | 20211110 | 0.00507 | 21111101 | 0.00592 | 22110101 |
| 0.00475 | 21122000 | 0.00398 | 22110110 | 0.00506 | 21121100 | 0.0056  | 21121010 |
| 0.00419 | 11211101 | 0.00383 | 21111200 | 0.00488 | 21111200 | 0.00516 | 11221100 |
| 0.00408 | 22110200 | 0.0036  | 22011110 | 0.00475 | 21210101 | 0.00456 | 21111110 |
| 0.00365 | 12111110 | 0.0035  | 11211110 | 0.00458 | 22110110 | 0.00425 | 22101110 |
| 0.00353 | 22011200 | 0.00342 | 22200101 | 0.00356 | 21120110 | 0.00373 | 12210110 |
| 0.00342 | 21112100 | 0.00337 | 21201110 | 0.00324 | 22101101 | 0.00373 | 22102100 |
| 0.00323 | 21121010 | 0.00311 | 22101101 | 0.00313 | 21202100 | 0.00354 | 21112100 |
| 0.00315 | 21210110 | 0.0028  | 21212000 | 0.0027  | 11222000 | 0.00316 | 22211000 |
| 0.0031  | 21111110 | 0.00267 | 12210200 | 0.00254 | 21112010 | 0.00307 | 11211101 |
| 0.00283 | 22011101 |         |          |         |          | 0.00296 | 22111010 |
| 0.0027  | 21211001 |         |          |         |          | 0.00271 | 22120001 |

---

## Cartesian Coordinat

| <b>C<sub>6</sub>H<sub>6</sub></b> |              |              |              | <b>Fulvene</b>        |              |              |              |
|-----------------------------------|--------------|--------------|--------------|-----------------------|--------------|--------------|--------------|
| C                                 | -1.201542000 | -0.693704000 | 0.000000000  | C                     | -1.172560514 | 0.109181556  | 0.000000000  |
| C                                 | -1.201542000 | 0.693704000  | 0.000000000  | C                     | 0.000000000  | -0.769608515 | 0.000000000  |
| C                                 | 0.000000000  | 1.387412000  | 0.000000000  | C                     | 1.172560514  | 0.109181556  | 0.000000000  |
| C                                 | 1.201542000  | 0.693704000  | 0.000000000  | C                     | 0.733320003  | 1.381699157  | 0.000000000  |
| C                                 | 1.201542000  | -0.693704000 | 0.000000000  | C                     | -0.733320003 | 1.381699157  | 0.000000000  |
| C                                 | 0.000000000  | -1.387412000 | 0.000000000  | H                     | -2.196935777 | -0.235039972 | 0.000000000  |
| H                                 | -2.140478000 | -1.235772000 | 0.000000000  | H                     | 1.347244199  | 2.272491727  | 0.000000000  |
| H                                 | -2.140478000 | 1.235772000  | 0.000000000  | H                     | -1.347244199 | 2.272491727  | 0.000000000  |
| H                                 | 0.000000000  | 2.471586000  | 0.000000000  | H                     | 2.196935777  | -0.235039972 | 0.000000000  |
| H                                 | 2.140478000  | 1.235772000  | 0.000000000  | C                     | 0.000000000  | -2.105898612 | 0.000000000  |
| H                                 | 2.140478000  | -1.235772000 | 0.000000000  | H                     | 0.926057070  | -2.670027652 | 0.000000000  |
| H                                 | 0.000000000  | -2.471586000 | 0.000000000  | H                     | -0.926057070 | -2.670027652 | 0.000000000  |
| <b>C<sub>4</sub>H<sub>4</sub></b> |              |              |              |                       |              |              |              |
| <b>D<sub>4h</sub></b>             |              |              |              | <b>D<sub>2h</sub></b> |              |              |              |
| C                                 | 0.000000000  | 0.000000000  | 1.064228000  | C                     | 0.782620000  | 0.000000000  | 0.663896000  |
| C                                 | 0.000000000  | 0.954193000  | 0.000000000  | C                     | -0.782620000 | 0.000000000  | 0.663896000  |
| C                                 | 0.000000000  | 0.000000000  | -1.064228000 | C                     | -0.782620000 | 0.000000000  | -0.663896000 |
| C                                 | 0.000000000  | -0.954193000 | 0.000000000  | C                     | 0.782620000  | 0.000000000  | -0.663896000 |
| H                                 | 0.000000000  | 0.000000000  | 2.135064000  | H                     | 1.546131000  | 0.000000000  | 1.429357000  |
| H                                 | 0.000000000  | 2.045656000  | 0.000000000  | H                     | -1.546131000 | 0.000000000  | 1.429357000  |
| H                                 | 0.000000000  | 0.000000000  | -2.135064000 | H                     | -1.546131000 | 0.000000000  | -1.429357000 |
| H                                 | 0.000000000  | -2.045656000 | 0.000000000  | H                     | 1.546131000  | 0.000000000  | -1.429357000 |
| <b>Triafulvene</b>                |              |              |              |                       |              |              |              |
|                                   | C            | 0.992620076  | -0.656644542 | 0.000000000           |              |              |              |
|                                   | C            | -0.280472025 | 0.000000000  | 0.000000000           |              |              |              |
|                                   | C            | 0.992620076  | 0.656644542  | 0.000000000           |              |              |              |
|                                   | H            | 1.565778301  | -1.569807648 | 0.000000000           |              |              |              |
|                                   | H            | 1.565778301  | 1.569807648  | 0.000000000           |              |              |              |
|                                   | C            | -1.605013057 | 0.000000000  | 0.000000000           |              |              |              |
|                                   | H            | -2.159661592 | 0.929159558  | 0.000000000           |              |              |              |
|                                   | H            | -2.159661592 | -0.929159558 | 0.000000000           |              |              |              |
| <b>C<sub>8</sub>H<sub>8</sub></b> |              |              |              |                       |              |              |              |
| <b>D<sub>8h</sub></b>             |              |              |              | <b>D<sub>4h</sub></b> |              |              |              |
| C                                 | 1.302716000  | 1.302716000  | 0.000000000  | C                     | 0.668571000  | 1.705783000  | 0.000000000  |
| C                                 | 1.302716000  | -1.302716000 | 0.000000000  | C                     | -1.705783000 | 0.668571000  | 0.000000000  |
| C                                 | 0.000000000  | 1.805805000  | 0.000000000  | C                     | 1.705783000  | 0.668571000  | 0.000000000  |
| C                                 | -1.302716000 | -1.302716000 | 0.000000000  | C                     | -0.668571000 | -1.705783000 | 0.000000000  |
| C                                 | 1.805805000  | 0.000000000  | 0.000000000  | C                     | -0.668571000 | 1.705783000  | 0.000000000  |
| C                                 | -1.805805000 | 0.000000000  | 0.000000000  | C                     | 0.668571000  | -1.705783000 | 0.000000000  |
| C                                 | -1.302716000 | 1.302716000  | 0.000000000  | C                     | 1.705783000  | -0.668571000 | 0.000000000  |
| C                                 | 0.000000000  | -1.805805000 | 0.000000000  | C                     | -1.705783000 | -0.668571000 | 0.000000000  |
| H                                 | 2.068819000  | 2.068819000  | 0.000000000  | H                     | 1.103686000  | 2.701573000  | 0.000000000  |
| H                                 | 2.068819000  | -2.068819000 | 0.000000000  | H                     | -2.701573000 | 1.103686000  | 0.000000000  |
| H                                 | 0.000000000  | 2.895471000  | 0.000000000  | H                     | 2.701573000  | 1.103686000  | 0.000000000  |
| H                                 | -2.068819000 | -2.068819000 | 0.000000000  | H                     | -1.103686000 | -2.701573000 | 0.000000000  |
| H                                 | 2.895471000  | 0.000000000  | 0.000000000  | H                     | -1.103686000 | 2.701573000  | 0.000000000  |
| H                                 | -2.895471000 | 0.000000000  | 0.000000000  | H                     | 1.103686000  | -2.701573000 | 0.000000000  |
| H                                 | -2.068819000 | 2.068819000  | 0.000000000  | H                     | 2.701573000  | -1.103686000 | 0.000000000  |
| H                                 | 0.000000000  | -2.895471000 | 0.000000000  | H                     | -2.701573000 | -1.103686000 | 0.000000000  |
| <b>Heptafulvene</b>               |              |              |              |                       |              |              |              |
|                                   | C            | -0.731861242 | 1.557463622  | 0.000000000           |              |              |              |
|                                   | C            | 0.583979360  | 1.275218081  | 0.000000000           |              |              |              |
|                                   | C            | 1.289003913  | 0.000000000  | 0.000000000           |              |              |              |
|                                   | C            | 0.583979360  | -1.275218081 | 0.000000000           |              |              |              |
|                                   | C            | -0.731861242 | -1.557463622 | 0.000000000           |              |              |              |
|                                   | C            | -1.868690330 | -0.673071057 | 0.000000000           |              |              |              |
|                                   | C            | -1.868690330 | 0.673071057  | 0.000000000           |              |              |              |
|                                   | H            | -0.982706262 | 2.614396214  | 0.000000000           |              |              |              |
|                                   | H            | 1.250244411  | 2.134409633  | 0.000000000           |              |              |              |
|                                   | H            | 1.250244411  | -2.134409633 | 0.000000000           |              |              |              |
|                                   | H            | -0.982706262 | -2.614396214 | 0.000000000           |              |              |              |
|                                   | H            | -2.837039404 | -1.164077111 | 0.000000000           |              |              |              |
|                                   | H            | -2.837039404 | 1.164077111  | 0.000000000           |              |              |              |
|                                   | C            | 2.638074017  | 0.000000000  | 0.000000000           |              |              |              |
|                                   | H            | 3.200959060  | -0.925225123 | 0.000000000           |              |              |              |
|                                   | H            | 3.200959060  | 0.925225123  | 0.000000000           |              |              |              |
